# Supplementary material for: Using the Conservation Standards Framework to Address the Effects of Climate Change on Biodiversity and Ecosystem Services
Source: MDPI journal article supplement (doi:10.3390/cli10020013), 2022-01-22
Supplement: s1 [file s1]

Archive with 1 entries (1 files):
- climate-1453683-supplementary.pdf
